# Supplementary material for: A dinuclear Co(iii)/Co(ii) complex based on the H2pmide ligand showing field-induced SMM behaviour
Source: Royal Society of Chemistry journal article supplement (doi:10.1039/d2dt03492a), 2022-12-07
Supplement: d2dt03492a1.pdf [file d2dt03492a1.pdf]

## Supporting Information

### A dinuclear Co(III)/Co(II) complex based on H<sub>2</sub>pmide ligand showing field-induced SMM behaviour

**Daiana Cabrosi<sup>[a]</sup>, Carlos Cruz<sup>[b],[c]</sup>, Verónica Paredes-García<sup>[b],[c]</sup> and Pablo Alborés<sup>[a]\*</sup>**

[a] Departamento de Química Inorgánica, Analítica y Química Física/ INQUIMAE (CONICET),  
Facultad de Ciencias Exactas y Naturales Universidad de Buenos Aires, Pabellón 2, Ciudad  
Universitaria, C1428EHA Buenos Aires, Argentina

Fax: +5411 / 4576-3341

E-mail: albores@qi.fcen.uba.ar

[b] Departamento de Ciencias Químicas, Facultad de Ciencias Exactas, Universidad Andres Bello,  
Avenida República 275, Santiago de Chile, Chile.

[c] Centro para el Desarrollo de la Nanociencia y Nanotecnología, CEDENNA, Santiago, Chile.

**Table S1.** Crystallographic data of complex **1**.

|                                                             |                                                                                                                                                                                                                     |
|-------------------------------------------------------------|---------------------------------------------------------------------------------------------------------------------------------------------------------------------------------------------------------------------|
| Empirical Formula                                           | C <sub>25</sub> H <sub>43</sub> Co <sub>2</sub> N <sub>2</sub> O <sub>9</sub>                                                                                                                                       |
| Formula weight                                              | 633.5                                                                                                                                                                                                               |
| <i>T</i> (K)                                                | 293 (2)                                                                                                                                                                                                             |
| Crystal system                                              | monoclinic                                                                                                                                                                                                          |
| Space Group                                                 | <i>P</i> 2 <sub>1</sub> / <i>n</i>                                                                                                                                                                                  |
| <i>a</i> (Å)                                                | 13.6175(5)                                                                                                                                                                                                          |
| <i>b</i> (Å)                                                | 11.0711(3)                                                                                                                                                                                                          |
| <i>c</i> (Å)                                                | 20.4071(7)                                                                                                                                                                                                          |
| $\alpha$ (°)                                                | 90                                                                                                                                                                                                                  |
| $\beta$ (°)                                                 | 105.529(3)                                                                                                                                                                                                          |
| $\gamma$ (°)                                                | 90                                                                                                                                                                                                                  |
| <i>V</i> (Å <sup>3</sup> )                                  | 2964.29(17)                                                                                                                                                                                                         |
| <i>Z</i>                                                    | 3                                                                                                                                                                                                                   |
| <i>D</i> <sub>calc</sub> (mg/m <sup>3</sup> )               | 1.419                                                                                                                                                                                                               |
| Absorption coefficient (mm <sup>-1</sup> )                  | 1.169                                                                                                                                                                                                               |
| <i>F</i> (000)                                              | 1332                                                                                                                                                                                                                |
| $\lambda$ (Å)                                               | 0.71073                                                                                                                                                                                                             |
| $\theta$ Range data collection (°)                          | 3.4 – 27.0                                                                                                                                                                                                          |
| Index ranges                                                | -17 ≤ <i>h</i> ≤ 15                                                                                                                                                                                                 |
|                                                             | -13 ≤ <i>k</i> ≤ 14                                                                                                                                                                                                 |
|                                                             | -25 ≤ <i>l</i> ≤ 25                                                                                                                                                                                                 |
| Reflections collected/unique                                | 18833/ 6367                                                                                                                                                                                                         |
| <i>R</i> <sub>int</sub>                                     | 0.0486                                                                                                                                                                                                              |
| Observed reflections [ <i>I</i> >2σ( <i>I</i> )]            | 4583                                                                                                                                                                                                                |
| Completeness (%)                                            | 99.7                                                                                                                                                                                                                |
| Maximum / minimum transmission                              | 0.91404/ 1.00000                                                                                                                                                                                                    |
| Data/restraints/parameters                                  | 6367/180/352                                                                                                                                                                                                        |
| Goodness-of-fit (GOF) on <i>F</i> <sup>2</sup>              | 1.047                                                                                                                                                                                                               |
| Final <i>R</i> -index [ <i>I</i> >2σ( <i>I</i> )]/ all data | 0.0661/ 0.0934                                                                                                                                                                                                      |
| <i>wR</i> index [ <i>I</i> >2σ( <i>I</i> )] /all data       | 0.1935/ 0.2214                                                                                                                                                                                                      |
| Largest peak and hole (e Å <sup>-3</sup> )                  | 1.889 and -1.755                                                                                                                                                                                                    |
| Weights, <i>w</i>                                           | 1/[σ <sup>2</sup> ( <i>F</i> <sub>o</sub> <sup>2</sup> ) + (0.1118 <i>P</i> ) <sup>2</sup> +<br>8.4195 <i>P</i> ]<br>where <i>P</i> =( <i>F</i> <sub>o</sub> <sup>2</sup> +2 <i>F</i> <sub>c</sub> <sup>2</sup> )/3 |

**Table S2.** Main bond lengths (Å) and angles (°) of complex **1**.

|     |     |          |    |     |    |          |
|-----|-----|----------|----|-----|----|----------|
| Co2 | O5  | 2.065(4) | O5 | Co2 | O7 | 94.7(2)  |
| Co2 | O2  | 2.100(4) | O5 | Co2 | O2 | 88.5(1)  |
| Co2 | O1  | 2.090(4) | O5 | Co2 | O1 | 86.1(1)  |
| Co2 | O4  | 2.089(4) | O5 | Co2 | O4 | 105.1(2) |
| Co2 | O7  | 2.019(4) | O3 | Co2 | O7 | 86.6(2)  |
| Co2 | O3  | 2.225(5) | O3 | Co2 | O4 | 60.4(2)  |
| Co1 | O1  | 1.897(4) | O3 | Co2 | O1 | 95.6(2)  |
| Co1 | O2  | 1.901(4) | O3 | Co2 | O2 | 106.0(2) |
| Co1 | N2  | 1.937(4) | N2 | Co1 | N1 | 85.0(2)  |
| Co1 | O8  | 1.919(5) | N2 | Co1 | O8 | 88.1(2)  |
| Co1 | O6  | 1.916(4) | N2 | Co1 | O2 | 85.6(2)  |
| Co1 | N1  | 1.932(4) | N2 | Co1 | O1 | 87.5(2)  |
| Co1 | Co2 | 2.964(1) | O6 | Co1 | O8 | 94.0(2)  |
|     |     |          | O6 | Co1 | N1 | 92.9(2)  |
|     |     |          | O6 | Co1 | O2 | 96.4(2)  |
|     |     |          | O6 | Co1 | O1 | 90.3(2)  |
|     |     |          | O6 | Co1 | N1 | 92.9(2)  |

**Table S3.** DFT-broken symmetry computed Mulliken spin density of complex **1** H-bonded dimeric unit.

|                 | HS                  | BS                   |
|-----------------|---------------------|----------------------|
| Co(II) sites    | 2.761161 / 2.761120 | -2.761087 / 2.761052 |
| O aqua ligands  | 0.029364 / 0.029375 | -0.029511 / 0.029519 |
| O pmide ligands | 0.032986 / 0.032971 | -0.032679 / 0.032666 |

**Table S4.** Complex **1** AC magnetic susceptibility data fitting parameters according to Debye model (see text).

| <i>T</i> / K | $\chi_S$ / cm <sup>3</sup> mol <sup>-1</sup> | $\chi_T$ / cm <sup>3</sup> mol <sup>-1</sup> | $\alpha$ | $\tau$ / s |
|--------------|----------------------------------------------|----------------------------------------------|----------|------------|
| 2            | 0.43                                         | 0.74                                         | 0.35     | 4.81E-05   |
| 2.2          | 0.4                                          | 0.7                                          | 0.33     | 4.98E-05   |
| 2.4          | 0.38                                         | 0.67                                         | 0.32     | 5.10E-05   |
| 2.6          | 0.35                                         | 0.63                                         | 0.31     | 5.07E-05   |

|     |      |      |      |          |
|-----|------|------|------|----------|
| 2.8 | 0.32 | 0.6  | 0.3  | 4.90E-05 |
| 3   | 0.3  | 0.57 | 0.28 | 4.70E-05 |
| 3.2 | 0.28 | 0.54 | 0.26 | 4.33E-05 |
| 3.5 | 0.26 | 0.5  | 0.25 | 3.97E-05 |
| 3.8 | 0.24 | 0.47 | 0.24 | 3.54E-05 |
| 4.1 | 0.22 | 0.45 | 0.23 | 3.15E-05 |
| 4.5 | 0.21 | 0.42 | 0.21 | 2.78E-05 |
| 4.9 | 0.19 | 0.39 | 0.18 | 2.47E-05 |
| 5.3 | 0.18 | 0.36 | 0.18 | 2.10E-05 |
| 5.7 | 0.17 | 0.34 | 0.15 | 1.86E-05 |
| 6.2 | 0.16 | 0.31 | 0.11 | 1.63E-05 |
| 6.7 | 0.15 | 0.29 | 0.08 | 1.35E-05 |
| 7.3 | 0.14 | 0.27 | 0.05 | 1.05E-05 |
| 7.9 | 0.13 | 0.25 | 0.03 | 7.58E-06 |
| 8.5 | 0.1  | 0.24 | 0.04 | 3.89E-06 |
| 9.2 | 0.09 | 0.22 | 0    | 2.14E-06 |
| 10  | 0.08 | 0.21 | 0    | 9.78E-07 |

| <b>H / Oe</b> | $\Delta\chi_1 / \text{cm}^3\text{mol}^{-1}$ | $\Delta\chi_2 / \text{cm}^3\text{mol}^{-1}$ | $\chi_s / \text{cm}^3\text{mol}^{-1}$ | $\alpha_1$ | $\tau_1 / \text{s}$ | $\alpha_2$ | $\tau_2 / \text{s}$ |
|---------------|---------------------------------------------|---------------------------------------------|---------------------------------------|------------|---------------------|------------|---------------------|
| 800           | 0.04                                        | 0.04                                        | 0.70                                  | 0.15       | 2.4e-4              | 5.7E-15    | 3.0E-6              |
| 1000          | 0.06                                        | 0.55                                        | 0.15                                  | 0.19       | 1.9E-4              | 1.5E-13    | 2.6E-6              |
| 1200          | 0.10                                        | 0.18                                        | 0.47                                  | 0.31       | 1.3E-4              | 0.10       | 6.8E-6              |

| <b>H / Oe</b> | $\chi_s / \text{cm}^3\text{mol}^{-1}$ | $\chi_T / \text{cm}^3\text{mol}^{-1}$ | $\alpha$ | $\tau / \text{s}$ |
|---------------|---------------------------------------|---------------------------------------|----------|-------------------|
| 1600          | 0.43                                  | 0.73                                  | 0.33     | 5.71E-05          |
| 1800          | 0.43                                  | 0.7                                   | 0.30     | 6.78E-05          |
| 2000          | 0.44                                  | 0.68                                  | 0.29     | 7.94E-05          |
| 2200          | 0.44                                  | 0.66                                  | 0.28     | 9.23E-05          |
| 2400          | 0.42                                  | 0.63                                  | 0.24     | 9.62E-05          |
| 2600          | 0.39                                  | 0.61                                  | 0.24     | 9.74E-05          |
| 2800          | 0.34                                  | 0.59                                  | 0.26     | 9.22E-05          |
| 3000          | 0.29                                  | 0.56                                  | 0.25     | 8.75E-05          |

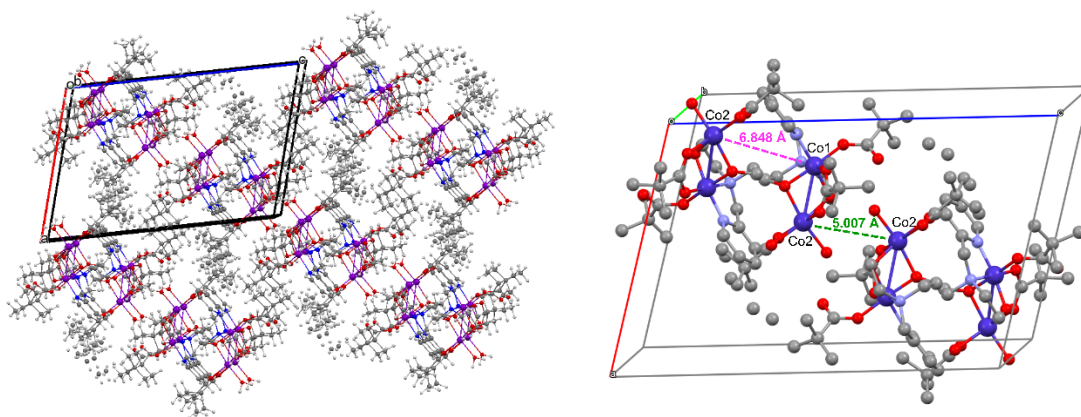

**Figure S1.** Complex **1** crystal structure molecular packing, view along *b*-axis (left); unit cell packing of two H-bond dimeric units (right).

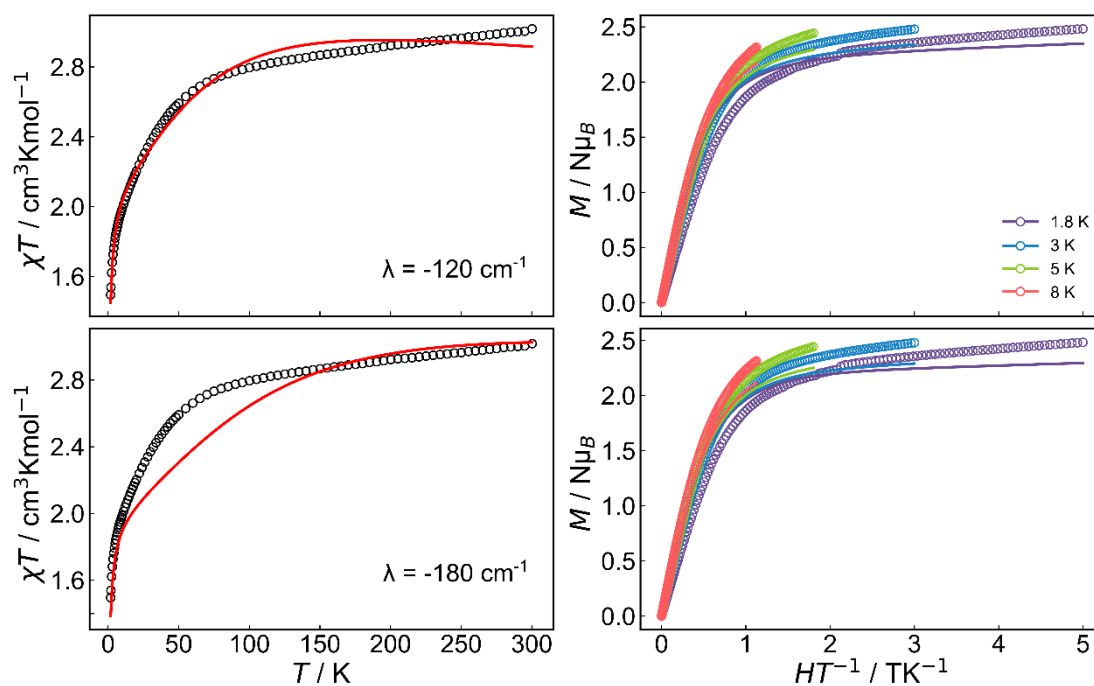

**Figure S2.** Magnetic susceptibility temperature dependence at 1000 Oe (left) and variable temperature reduced magnetization up to 90 kOe (right) of complex **1**. Open symbols: experimental; full line: best fitting according to Hamiltonian of Eq .2, see text for details.

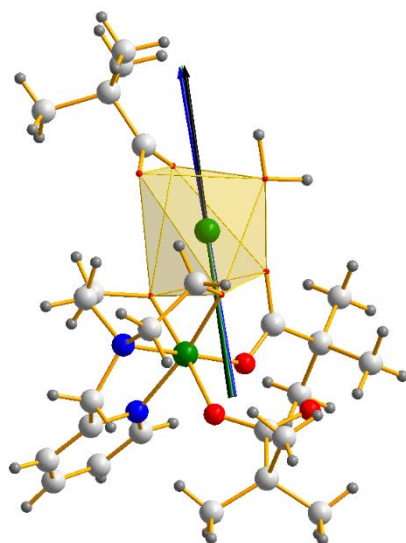

**Figure S3.** Complex **1** Co(II) site main axis orientation as arising from *ab-initio* computations; *D*-tensor (black), *g* tensor (blue) and ground state KD *g* tensor (green).

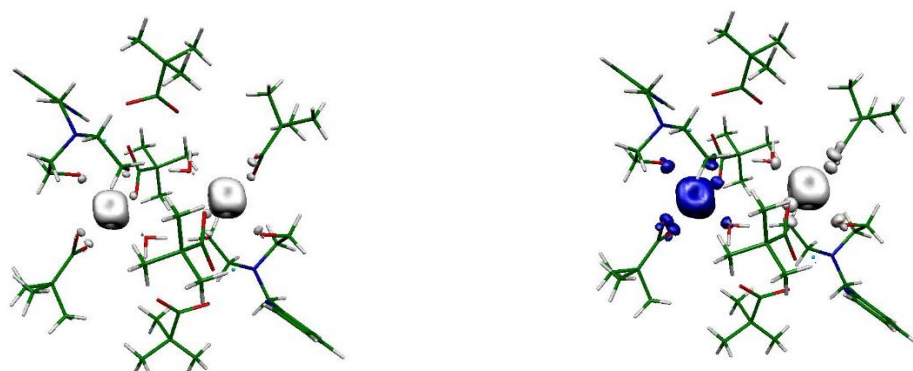

**Figure S4.** Spin density isosurfaces (0.02 a.u.) arising from BS-DFT computation of complex **1** H-bonded dimeric unit; High-spin (HS) left, Broken-Symmetry (BS), right.

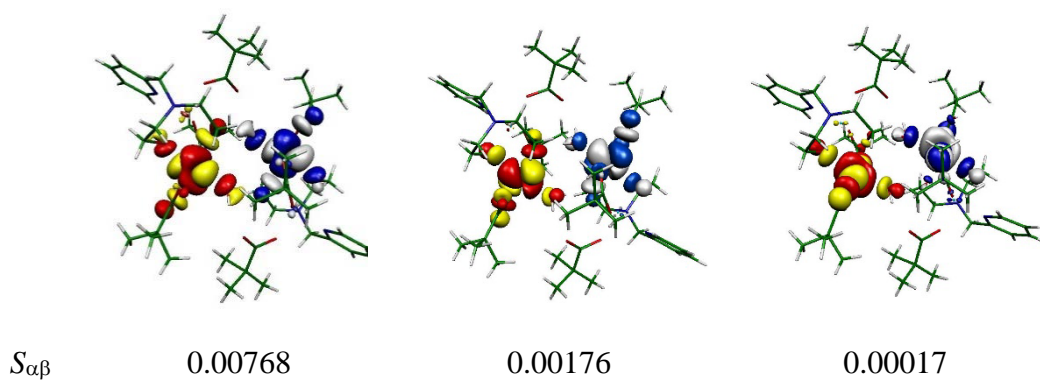

**Figure S5.** Magnetic orbitals isosurfaces (0.02 a.u.) and overlap integral in terms of COT arising from BS-DFT computation of complex **1** H-bonded dimeric unit.

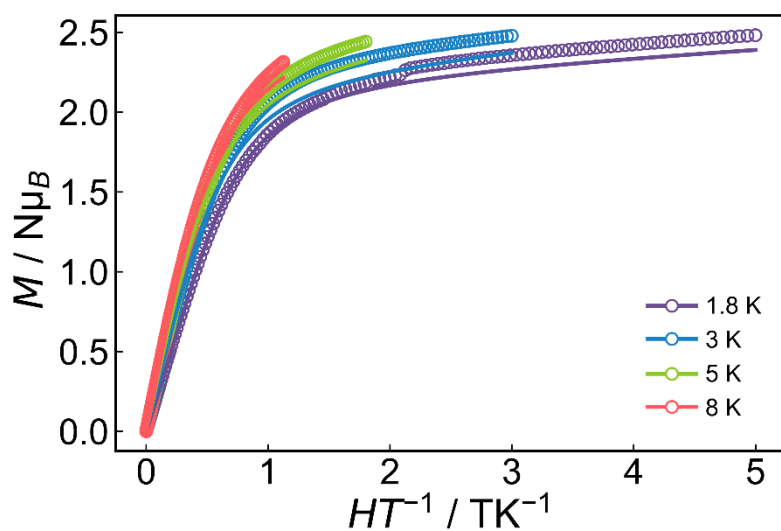

**Figure S6.** Variable temperature reduced magnetization up to 90 kOe (right) of complex **1**. Open symbols: experimental; full line: best fitting according to Hamiltonian of Eq .4, see text for details.

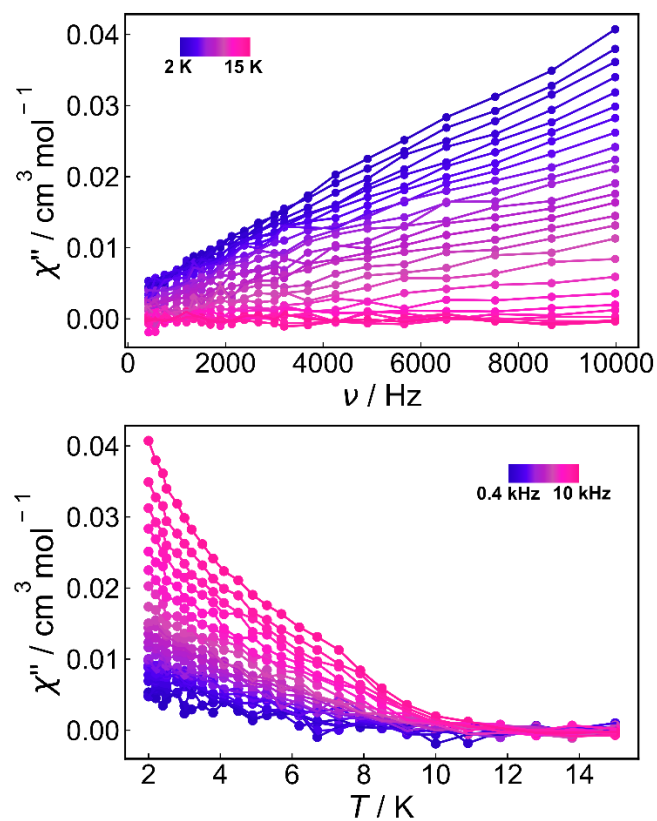

**Figure S7.** AC magnetic susceptibility of complex **1**. Variable temperature data at 300 Oe external DC field. Full symbols: experimental; full line: eye guideline.

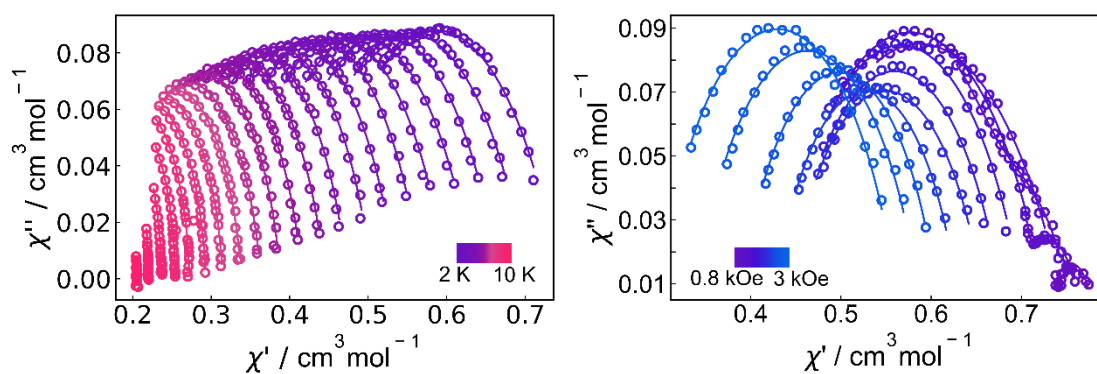

**Figure S8.** Cole-Cole plots of complex **1** AC magnetic susceptibility data. Temperature and frequency sweeping at 1500 Oe DC external field (left); external DC field sweeping at 2 K (right). Open symbols: experimental; full lines: simulated with best fitting parameters arising from the generalized Debye model (see text).



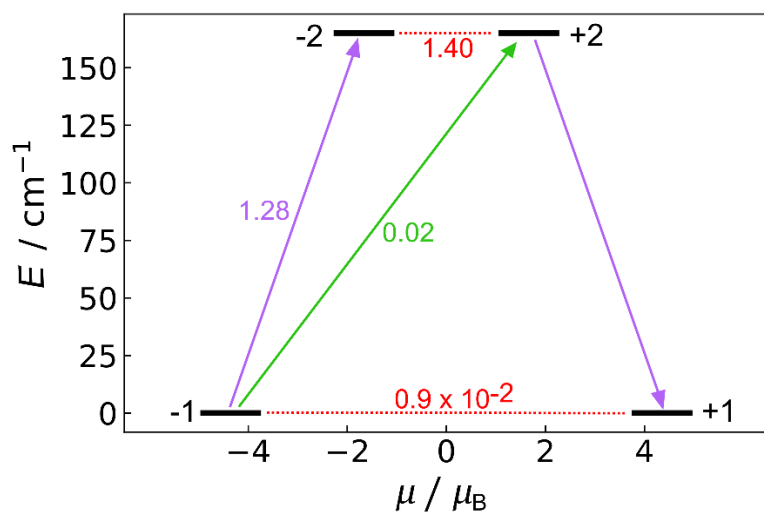

**Figure S9.** *Ab-initio* computed low lying energy levels (two lowest KDs) and transition moment matrix elements showing most probable magnetization relaxation pathway.

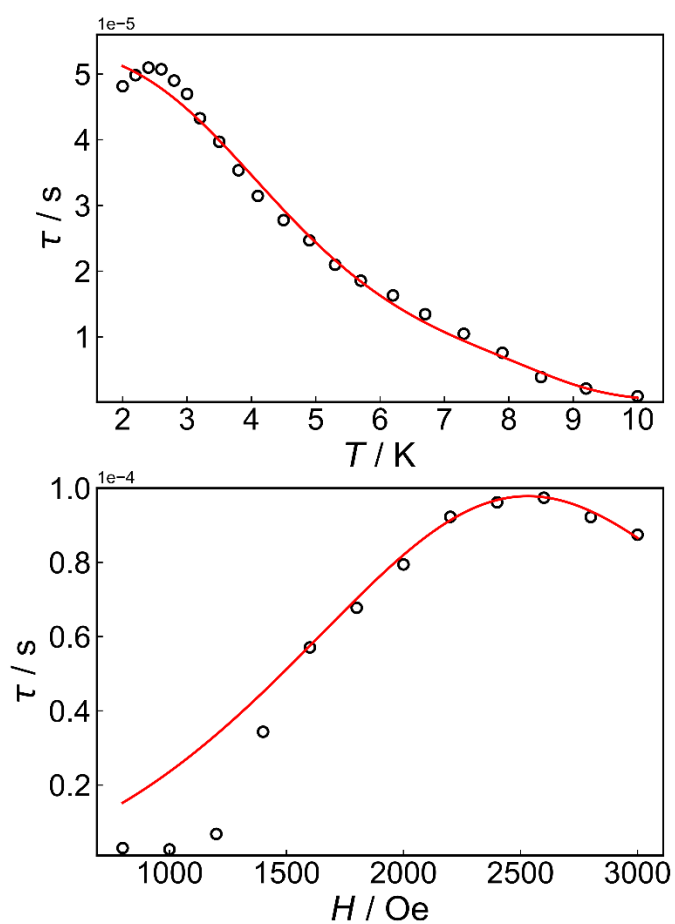

**Figure S10.** Complex **1** magnetization characteristic relaxation time temperature dependence at 1500 Oe DC external field (top) and field dependence at 2 K (bottom).

Open symbols: experimental; full line: simulation with best simultaneous fitting parameters according to Eq. 5 (see text for details).

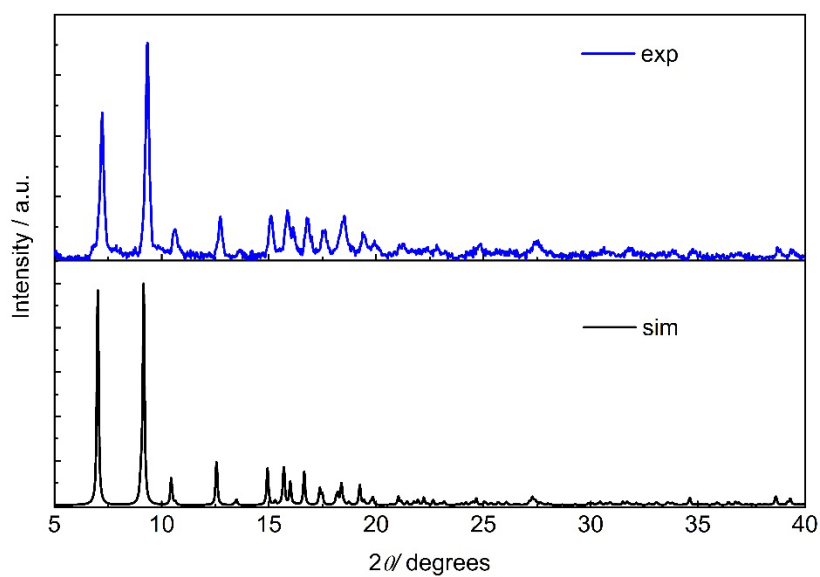

**Figure S11.** Powder X-ray diffractogram of complex **1** at room temperature. Top: experimental data; bottom: simulated data from single crystal X-ray refinement.
